# Supplementary material for: A systematic review and meta-analysis of retrograde type A aortic dissection after thoracic endovascular aortic repair in patients with type B aortic dissection
Source: PubMed Central journal article supplement — Medicine (Baltimore). 2023 Apr 14;102(15):e32944. doi: 10.1097/MD.0000000000032944 (PMC10101253; doi:10.1097/md.0000000000032944), 2023-04-14
Supplement: medi-102-e32944-s002.pdf [file medi-102-e32944-s002.pdf]

|                 |     |    |    |    |     |    |    |    |    |    |    |    |    |    |     |    |     |    |    |    |     |    |
|-----------------|-----|----|----|----|-----|----|----|----|----|----|----|----|----|----|-----|----|-----|----|----|----|-----|----|
| Wang            | 365 | NR | 43 | NR | NR  | NR | 17 | NR | 53 | NR | 6  | NR | 14 | NR | 120 | NR | 237 | NR | 24 | NR | 120 | NR |
| Yamine          | 173 | 13 | 31 | 1  | 46  | 1  | 47 | 3  | 37 | 1  | 6  | 1  | NR | NR | NR  | NR | NR  | NR | NR | NR | 92  | 7  |
| Miura           | 22  | NR | 3  | NR | 3   | NR | 3  | NR | 3  | NR | 0  | 0  | NR | NR | NR  | NR | NR  | NR | NR | NR | 15  | NR |
| Chassin-Trubert | NR  | NR | NR | NR | NR  | NR | NR | NR | NR | NR | NR | NR | NR | NR | NR  | NR | NR  | NR | NR | NR | NR  | NR |
| Pellenc         | NR  | NR | NR | NR | NR  | NR | NR | NR | NR | NR | NR | NR | NR | NR | NR  | NR | NR  | NR | NR | NR | NR  | NR |
| Jiechang Zhu    | 18  | NR | 1  | NR | 7   | NR | 3  | NR | 2  | NR | 1  | NR | NR | NR | NR  | NR | NR  | NR | NR | NR | NR  | NR |
| Riesterer       | NR  | NR | NR | NR | NR  | NR | NR | NR | NR | NR | NR | NR | NR | NR | NR  | NR | NR  | NR | NR | NR | NR  | NR |
| Giles           | 236 | NR | 32 | NR | 47  | NR | 85 | NR | 34 | NR | 15 | NR | 1  | NR | 45  | NR | 207 | NR | 5  | NR | 101 | NR |
| Kuo             | 65  | NR | 7  | NR | 3   | NR | 4  | NR | 6  | NR | NR | NR | NR | NR | NR  | NR | NR  | NR | NR | NR | 37  | NR |
| Joo             | NR  | NR | NR | NR | NR  | NR | NR | NR | NR | NR | NR | NR | NR | NR | NR  | NR | NR  | NR | NR | NR | NR  | NR |
| Cao             | NR  | NR | NR | NR | NR  | NR | NR | NR | NR | NR | NR | NR | NR | NR | NR  | NR | NR  | NR | NR | NR | NR  | NR |
| El-Beyroui      | NR  | NR | NR | NR | NR  | NR | NR | NR | NR | NR | NR | NR | NR | NR | NR  | NR | NR  | NR | NR | NR | NR  | NR |
| Charltonouw     | NR  | NR | NR | NR | NR  | NR | NR | NR | NR | NR | NR | NR | NR | NR | NR  | NR | NR  | NR | NR | NR | NR  | NR |
| Lou             | 81  | NR | 4  | NR | NR  | NR | 3  | NR | 5  | NR | NR | NR | NR | NR | NR  | NR | NR  | NR | NR | NR | 31  | NR |
| Lee             | 66  | NR | 20 | NR | 17  | NR | 7  | NR | NR | NR | 0  | NR | NR | NR | NR  | NR | NR  | NR | NR | NR | 29  | NR |
| Oshi            | 39  | NR | 5  | NR | NR  | NR | 3  | NR  | NR | NR  | NR | NR | NR | 23  | NR |
| Puech-Leao      | NR  | NR | NR | NR | NR  | NR | NR | NR | NR | NR | 0  | 0  | NR | NR | NR  | NR | NR  | NR | NR | NR | NR  | NR |
| Sobocinski      | 24  | NR | 2  | NR | 2   | NR | NR | NR | 4  | NR | 0  | 0  | 3  | NR | 20  | NR | 15  | NR | 2  | NR | 11  | NR |
| Shuo Zhao       | 50  | NR | 13 | NR | NR  | NR | NR | NR | NR | NR | NR | NR | NR | NR | NR  | NR | NR  | NR | NR | NR | 33  | NR |
| Bavaria         | 45  | NR | 4  | NR | 3   | NR | 12 | NR | 3  | NR | NR | NR | NR | NR | NR  | NR | NR  | NR | NR | NR | NR  | NR |
| Peidro          | NR  | NR | NR | NR | NR  | NR | NR | NR | NR | NR | NR | NR | NR | NR | NR  | NR | NR  | NR | NR | NR | NR  | NR |
| Ding            | 14  | NR | 2  | NR | 1   | NR | 1  | NR  | NR | NR  | NR | NR | NR | 10  | NR |
| Nozdrzykowskia  | NR  | NR | NR | NR | NR  | NR | NR | NR | NR | NR | NR | NR | NR | NR | NR  | NR | NR  | NR | NR | NR | NR  | NR |
| Lei Liu         | 197 | NR | 47 | NR | 102 | NR | NR | NR | 62 | NR | NR | NR | NR | NR | NR  | NR | NR  | NR | NR | NR | 154 | NR |
| Hu              | NR  | NR | NR | NR | NR  | NR | NR | NR | NR | NR | NR | NR | NR | NR | NR  | NR | NR  | NR | NR | NR | NR  | NR |
| Gao             | 552 | NR | 38 | NR | 51  | NR | NR | NR | NR | NR | 0  | 0  | NR | NR | NR  | NR | NR  | NR | NR | NR | 337 | NR |

ASA, American Society of Anesthesiology physical status classification; NR, not reported
