# Supplementary material for: A systematic review and meta-analysis of retrograde type A aortic dissection after thoracic endovascular aortic repair in patients with type B aortic dissection
Source: PubMed Central journal article supplement — Medicine (Baltimore). 2023 Apr 14;102(15):e32944. doi: 10.1097/MD.0000000000032944 (PMC10101253; doi:10.1097/md.0000000000032944), 2023-04-14
Supplement: medi-102-e32944-s003.pdf [file medi-102-e32944-s003.pdf]

**S3 Table.** Type B aortic dissection chronicity

| <b>Author</b> | <b>Year</b> | <b>TEVAR (N)</b> | <b>Acute TBAD<br/>(N)</b> | <b>Chronic TBAD<br/>(N)</b> | <b>RTAD (n)</b> | <b>RTAD in acute<br/>TBAD (n)</b> | <b>RTAD in chronic<br/>TBAD (n)</b> |
|---------------|-------------|------------------|---------------------------|-----------------------------|-----------------|-----------------------------------|-------------------------------------|
| Czermak       | 2002        | 5                | 5                         | NR                          | 1               | 1                                 | 0                                   |
| Kato          | 2002        | 28               | 14                        | 14                          | 1               | 1                                 | 0                                   |
| Palmer        | 2002        | 14               | 1                         | 13                          | 2               | 0                                 | 2                                   |
| Fattori       | 2003        | 22               | 5                         | 17                          | 2               | NR                                | NR                                  |
| Grabenwoger   | 2004        | 20               | NR                        | NR                          | 1               | 1                                 | 0                                   |
| Hansen        | 2004        | 24               | 16                        | 8                           | 1               | 1                                 | 0                                   |
| Lee           | 2004        | 37               | 9                         | 37                          | 1               | 1                                 | 0                                   |
| Dong Xu       | 2005        | 24               | 1                         | 23                          | 3               | NR                                | NR                                  |
| Fattori       | 2006        | 180              | 37                        | 163                         | 2               | NR                                | NR                                  |
| Duebener      | 2007        | 13               | 13                        | 0                           | 1               | 1                                 | 0                                   |
| Zipfel        | 2007        | 57               | NR                        | NR                          | 1               | NR                                | NR                                  |
| Kpodonu       | 2008        | 91               | NR                        | NR                          | 6               | NR                                | NR                                  |
| Neuhauser     | 2008        | 28               | 28                        | 0                           | 5               | 5                                 | 0                                   |
| Dong          | 2009        | 443              | NR                        | NR                          | 11              | NR                                | NR                                  |
| Chiesa        | 2011        | 188              | NR                        | NR                          | 3               | NR                                | NR                                  |

|            |      |     |     |     |    |    |    |
|------------|------|-----|-----|-----|----|----|----|
| Kim        | 2011 | 41  | 41  | 0   | 3  | 3  | 0  |
| Oberhuber  | 2011 | 19  | 0   | 19  | 1  | 0  | 1  |
| Parsa      | 2011 | 51  | 0   | 51  | 2  | 0  | 2  |
| Wiedemann  | 2013 | 80  | 60  | 20  | 3  | NR | NR |
| Lotfi      | 2013 | 11  | 0   | 11  | 3  | 0  | 3  |
| Wiedemann  | 2014 | 110 | 110 | 0   | 6  | 6  | 0  |
| Faure      | 2014 | 41  | 15  | 26  | 1  | NR | NR |
| Idrees     | 2014 | 766 | NR  | NR  | 15 | NR | NR |
| Zhang      | 2014 | 252 | 110 | 142 | 2  | NR | NR |
| Gorlitzer  | 2012 | 29  | 29  | 0   | 4  | 4  | 0  |
| Huang      | 2013 | 563 | NR  | NR  | 4  | NR | NR |
| Cochernnec | 2013 | 17  | 5   | 12  | 4  | 3  | 1  |
| Shuyang Lu | 2012 | 419 | NR  | NR  | 9  | 8  | 1  |
| Yang       | 2012 | 61  | 33  | 28  | 1  | 0  | 1  |
| Bunger     | 2013 | 45  | 10  | 35  | 1  | 1  | 0  |
| Canaud     | 2014 | 309 | 114 | 195 | 11 | 5  | 6  |
| Lombardi   | 2012 | 40  | 24  | 16  | 3  | 2  | 1  |
| Jia        | 2013 | 208 | 208 | 208 | 3  | 0  | 3  |
| Li         | 2014 | 669 | 319 | 350 | 6  | 6  | 0  |

|                  |      |     |     |     |    |    |    |
|------------------|------|-----|-----|-----|----|----|----|
| Hanna            | 2014 | 50  | 50  | NR  | 1  | 1  | 0  |
| De Rango         | 2014 | 104 | NR  | NR  | 4  | NR | NR |
| Appoo            | 2015 | 16  | NR  | NR  | 0  | 0  | 0  |
| Desai            | 2015 | 132 | 144 | 18  | 9  | 9  | 0  |
| Kische           | 2015 | 35  | 25  | 10  | 1  | 1  | 0  |
| Bockler          | 2016 | 24  | 16  | 8   | 1  | 1  | 0  |
| Faure            | 2016 | 33  | NR  | NR  | 1  | NR | NR |
| Wang             | 2016 | 360 | NR  | NR  | 5  | 5  | 0  |
| Asaloumidis      | 2017 | 40  | 40  | 40  | 2  | 0  | 2  |
| Zhao Liu         | 2017 | 58  | 43  | 15  | 6  | NR | NR |
| Min-Hong Zhang   | 2017 | 85  | 60  | 25  | 3  | 2  | 1  |
| Tjaden           | 2018 | 264 | 170 | 94  | 6  | 3  | 3  |
| Tao Ma           | 2018 | 852 | 551 | 301 | 27 | NR | NR |
| Laquian          | 2018 | 27  | 27  | 0   | 1  | 1  | 0  |
| Chen             | 2018 | 167 | 167 | 0   | 1  | 1  | 0  |
| Piotr Buczkowski | 2019 | 68  | NR  | NR  | 2  | NR | NR |
| Eleshra          | 2020 | 64  | 64  | 0   | 1  | 1  | 0  |
| Fukushima        | 2019 | 24  | 0   | 24  | 0  | NR | NR |
| Wang             | 2019 | 397 | 204 | 193 | 6  | 2  | 4  |

|                 |      |     |     |     |    |    |    |
|-----------------|------|-----|-----|-----|----|----|----|
| Yammine         | 2019 | 186 | 104 | 80  | 15 | 10 | 5  |
| Miura           | 2019 | 22  | 9   | 13  | 0  | 0  | 0  |
| Chassin-Trubert | 2020 | 17  | 17  | 0   | 0  | 0  | 0  |
| Pellenc         | 2019 | 20  | 0   | 20  | 0  | 0  | 0  |
| Jiechang Zhu    | 2018 | 20  | 20  | 0   | 0  | 0  | 0  |
| Riesterer       | 2018 | 34  | 24  | 10  | 1  | 1  | 0  |
| Giles           | 2019 | 258 | 128 | 130 | 12 | 7  | 5  |
| Kuo             | 2019 | 71  | 71  | 0   | 2  | 2  | 0  |
| Joo             | 2019 | 17  | 1   | 16  | 2  | 0  | 2  |
| Cao             | 2020 | 76  | 73  | 3   | 4  | NR | NR |
| El-Beyrouti     | 2020 | 5   | NR  | NR  | 0  | NR | NR |
| Charltonouw     | 2018 | 43  | 43  | 0   | 3  | 3  | 0  |
| Lou             | 2020 | 91  | 91  | 0   | 3  | 3  | 0  |
| Lee             | 2020 | 87  | 35  | 52  | 2  | 1  | 1  |
| Oshi            | 2020 | 40  | 0   | 40  | 1  | 0  | 1  |
| Puech-Leao      | 2020 | 42  | 0   | 42  | 4  | 0  | 4  |
| Sobocinski      | 2020 | 41  | 41  | 0   | 2  | 2  | 0  |
| Shuo Zhao       | 2020 | 79  | 63  | 16  | 1  | NR | NR |
| Bavaria         | 2015 | 50  | 50  | 0   | 2  | 2  | 0  |

|                |      |     |     |     |    |    |    |
|----------------|------|-----|-----|-----|----|----|----|
| Peidro         | 2018 | 26  | NR  | NR  | 2  | NR | NR |
| Ding           | 2018 | 16  | 3   | 13  | 1  | NR | NR |
| Nozdrzykowskia | 2015 | 129 | NR  | NR  | 1  | 0  | 1  |
| Lei Liu        | 2016 | 203 | 100 | 103 | 11 | 7  | 4  |
| Hu             | 2019 | 571 | NR  | NR  | 12 | NR | NR |
| Gao            | 2019 | 751 | 408 | 343 | 4  | NR | NR |

NR, not reported; RTAD, retrograde type A dissection; TEVAR, thoracic endovascular aortic repair; TBAD, type B aortic dissection
