# Supplementary material for: A systematic review and meta-analysis of retrograde type A aortic dissection after thoracic endovascular aortic repair in patients with type B aortic dissection
Source: PubMed Central journal article supplement — Medicine (Baltimore). 2023 Apr 14;102(15):e32944. doi: 10.1097/MD.0000000000032944 (PMC10101253; doi:10.1097/md.0000000000032944), 2023-04-14
Supplement: medi-102-e32944-s004.pdf [file medi-102-e32944-s004.pdf]

**S4 Table.** Time to occurrence of retrograde type A dissection

| First Author | RTAD | RTAD after TEVAR                                                             | 0-14 days | Early<br>30 days | 1-12<br>months | after one<br>year | Early<br>RTAD | Late RTAD |
|--------------|------|------------------------------------------------------------------------------|-----------|------------------|----------------|-------------------|---------------|-----------|
| Czermak      | 1    | one month after TEVAR                                                        | 0         | 1                | 0              | 0                 | 1             | 0         |
| Kato         | 1    | as late complication                                                         | NR        | NR               | NR             | NR                | 0             | 1         |
| Palmer       | 2    | as early complication (during one week)                                      | 1         | 1                | 0              | 0                 | NR            | NR        |
| Fattori      | 2    | one cases at 8th day after TEVAR and one cases<br>during 20 days after TEVAR | 1         | 2                | 0              | 0                 | 2             | 0         |
| Grabenwoger  | 1    | Three months after TEVAR                                                     | 0         | 0                | 1              | 0                 | 1             | 0         |
| Hansen       | 1    | 2 months after TEVAR                                                         | 0         | 0                | 1              | 0                 | 1             | 0         |
| Lee          | 1    | 1 month after TEVAR                                                          | 0         | 1                | 0              | 0                 | 1             | 0         |
| Dong Xu      | 3    | First case: intraoperative, second case: POD 1,<br>and third case: POD7      | 3         | 3                | 0              | 0                 | 3             | 0         |
| Fattori      | 2    | In-Hospital                                                                  | 2         | 2                | 0              | 0                 | 2             | 0         |
| Duebener     | 1    | NR                                                                           | NR        | NR               | NR             | NR                | NR            | NR        |
| Zipfel       | 1    | Intraoperative                                                               | 1         | 1                | 0              | 0                 | 1             | 0         |
| Kpodonu      | 6    | POD1, POD10, 1 month, 19 month, 21 month,<br>and 30 month                    | 2         | 3                | 0              | 3                 | 3             | 3         |

|           |    |                                                                                                            |    |    |    |    |    |    |
|-----------|----|------------------------------------------------------------------------------------------------------------|----|----|----|----|----|----|
| Neuhauser | 5  | POD3, POD3, POD 26, POD29, POD1170                                                                         | 2  | 4  | 0  | 1  | 4  | 1  |
| Dong      | 11 | 2 cases intraoperative, 2h, 1 week, 2 cases one month, 6 months, 9 months, 12 months, 29 months, 36 months | 3  | 6  | 3  | 2  | 6  | 5  |
| Chiesa    | 3  | During 3 months after TEVAR                                                                                | NR | NR | NR | 0  | 3  | 0  |
| Kim       | 3  | NR                                                                                                         | NR | NR | NR | NR | NR | NR |
| Oberhuber | 1  | 7 months after TEVAR                                                                                       | 0  | 0  | 1  | 0  | 0  | 1  |
| Parsa     | 2  | Intraoperative, POD 5                                                                                      | 2  | 2  | 0  | 0  | 2  | 0  |
| Wiedemann | 3  | NR                                                                                                         | NR | NR | NR | NR | NR | NR |
| Lotfi     | 3  | 1 patient during 1 month and other patients no data                                                        | 0  | 1  | NR | NR | 1  | NR |
| Wiedemann | 6  | NR                                                                                                         | NR | NR | NR | NR | NR | NR |
| Faure     | 1  | NR                                                                                                         | NR | NR | NR | NR | NR | NR |
| Idrees    | 15 | 3 cases during 1 month after TEVAR and 12 cases during first 6 months                                      | NR | 3  | 12 | 0  | 3  | 12 |
| Zhang     | 2  | NR                                                                                                         | NR | NR | NR | NR | NR | NR |
| Gorlitzer | 4  | 3 cases (immediately after TEVAR) and 1 case POD 7                                                         | 4  | 4  | 0  | 0  | 4  | 0  |

|            |    |                                                                                                      |    |    |    |    |    |    |
|------------|----|------------------------------------------------------------------------------------------------------|----|----|----|----|----|----|
| Huang      | 4  | 2 cases (immediately after TEVAR), POD9,<br>POD10                                                    | 4  | 4  | 0  | 0  | 4  | 0  |
| Cochernec  | 4  | 2 cases (in hospital), 2 cases (unknown)                                                             | 2  | 2  | NR | NR | 2  | NR |
| Shuyang Lu | 9  | NR                                                                                                   | NR | NR | NR | NR | NR | NR |
| Yang       | 1  | 1 case during 4 months                                                                               | 0  | 0  | 1  | 0  | 0  | 1  |
| Bunger     | 1  | 1 case (POD 14)                                                                                      | 1  | 1  | 0  | 0  | 1  | 0  |
| Canaud     | 11 | NR                                                                                                   | NR | NR | NR | NR | NR | NR |
| Lombardi   | 3  | 2 cases during one months and 1 cases during one<br>year                                             | NR | 2  | 1  | 0  | 2  | 1  |
| Jia        | 3  | 2 cases: Intraoperatively and conversion to open<br>reapir and 1 case: late                          | 2  | NR | NR | NR | 2  | 1  |
| Li         | 6  | NR                                                                                                   | NR | NR | NR | NR | NR | NR |
| Hanna      | 1  | Intraoperatively: emergent repair of RTAD<br>detected on completion TEE after endovascular<br>repair | 1  | 1  | 0  | 0  | 1  | 0  |
| De Rango   | 4  | 1 cses (intra-OP), 1 case (POD10) and 2 cases<br>(durng 30 days after TEVAR)                         | 2  | 4  | 0  | 0  | 4  | 0  |
| Appoo      | 0  | 0 cases                                                                                              | 0  | 0  | 0  | 0  | 0  | 0  |

|                  |    |                                                                                             |    |    |    |    |    |    |
|------------------|----|---------------------------------------------------------------------------------------------|----|----|----|----|----|----|
| Desai            | 9  | 7 Cases RTAD during one year and 2 Cases<br>RTAD after one year                             | 0  | 0  | 7  | 2  | 0  | 9  |
| Kische           | 1  | POD 13                                                                                      | 1  | 1  | 0  | 0  | 1  | 0  |
| Bockler          | 1  | 1 cases RTAD during 30 days)                                                                | 0  | 1  | 0  | 0  | 1  | 0  |
| Faure            | 1  | POD 4                                                                                       | 1  | 1  | 0  | 0  | 1  | 0  |
| Wang             | 5  | Case 1: 13 days; Case 2: 30 days; Case3: 10 days;<br>Case 4: 1 year; Case 5: Intraoperative | 3  | 4  | 1  | 0  | 4  | 1  |
| Asaloumidis      | 2  | POD 10 and POD 20                                                                           | 1  | 2  | 0  | 0  | 2  | 1  |
| Zhao Liu         | 6  | NR                                                                                          | NR | NR | NR | NR | NR | NR |
| Min-Hong Zhang   | 3  | 1, and 8 and 21 months after TEVAR                                                          | 0  | 1  | 1  | 1  | 1  | 2  |
| Tjaden           | 6  | NR                                                                                          | NR | NR | NR | NR | NR | NR |
| Tao Ma           | 27 | NR                                                                                          | NR | NR | NR | NR | NR | NR |
| Laquian          | 1  | in hospital                                                                                 | 1  | 1  | 0  | 0  | 1  | 0  |
| Chen             | 1  | NR                                                                                          | NR | NR | NR | NR | NR | NR |
| Piotr Buczkowski | 2  | during first 30 days                                                                        | NR | 2  | 0  | 0  | 2  | 0  |
| Eleshra          | 1  | RTAD 39 days after TEVAR                                                                    | 0  | 0  | 1  | 0  | 1  | 0  |
| Fukushima        | 0  | NR                                                                                          | NR | NR | NR | NR | NR | NR |
| Wang             | 6  | during first 30 days                                                                        | NR | 6  | NR | NR | 6  | NR |

|                 |    |                                                                                                         |    |    |    |    |    |    |
|-----------------|----|---------------------------------------------------------------------------------------------------------|----|----|----|----|----|----|
| Yamine          | 15 | 1 case (Intra-OP), 5 cases (during first 30 days), 6 cases (during 1 year) and 3 cases (after One year) | 1  | 6  | 6  | 3  | NR | NR |
| Miura           | 0  | NR                                                                                                      | NR | NR | NR | NR | NR | NR |
| Chassin-Trubert | 0  | NR                                                                                                      | 0  | 0  | 0  | 0  | 0  | 0  |
| Pellenc         | 0  | NR                                                                                                      | 0  | 0  | 0  | 0  | 0  | 0  |
| Jiechang Zhu    | 0  | NR                                                                                                      | 0  | 0  | 0  | 0  | 0  | 0  |
| Riesterer       | 1  | POD 6                                                                                                   | 1  | 1  | 0  | 0  | 1  | 0  |
| Giles           | 12 | NR                                                                                                      | NR | NR | NR | NR | NR | NR |
| Kuo             | 2  | NR                                                                                                      | NR | NR | NR | NR | NR | NR |
| Joo             | 2  | 2, and 30 months after TEVAR                                                                            | 0  | 0  | 1  | 1  | 1  | 1  |
| Cao             | 4  | NR                                                                                                      | NR | NR | NR | NR | NR | NR |
| El-Beyrouti     | 0  | NR                                                                                                      | NR | NR | NR | NR | NR | NR |
| Charltonow      | 3  | NR                                                                                                      | NR | NR | NR | NR | NR | NR |
| Lou             | 3  | NR                                                                                                      | NR | NR | NR | NR | NR | NR |
| Lee             | 2  | first case RTAD (715 days after TEVAR) and second case RTAD (1550 days after TEVAR)                     | 0  | 0  | 0  | 2  | 0  | 2  |
| Oshi            | 1  | 7 months after TEVAR                                                                                    | 0  | 0  | 1  | 0  | 0  | 1  |
| Puech-Leao      | 4  | 4 cases: Intraoperative                                                                                 | 4  | 4  | 0  | 0  | 4  | 0  |
| Sobocinski      | 2  | during 30 days                                                                                          | NR | 2  | NR | NR | 2  | NR |

|                |    |                                                                                                                                              |    |    |    |    |    |    |
|----------------|----|----------------------------------------------------------------------------------------------------------------------------------------------|----|----|----|----|----|----|
| Shuo Zhao      | 1  | POD 5                                                                                                                                        | 1  | 1  | 0  | 0  | 1  | 0  |
| Bavaria        | 2  | POD5, POD56                                                                                                                                  | 1  | 0  | 1  | 0  | 2  | 0  |
| Peidro         | 2  | NR                                                                                                                                           | NR | NR | NR | NR | NR | NR |
| Ding           | 1  | 3 months after TEVAR                                                                                                                         | 0  | 0  | 1  | 0  | 1  | 0  |
| Nozdrzykowskia | 1  | NR                                                                                                                                           | NR | NR | NR | NR | NR | NR |
| Lei Liu        | 11 | 2 cases RTAD (during first week), 6 cases (during first month), 1 case (after 4 months), 1 case (after 5 months) and 1 case (after 8 months) | 2  | 8  | 3  | 0  | 8  | 3  |
| Hu             | 12 | NR                                                                                                                                           | NR | NR | NR | NR | NR | NR |
| Gao            | 4  | NR                                                                                                                                           | NR | NR | NR | NR | NR | NR |
