# Supplementary material for: A systematic review and meta-analysis of retrograde type A aortic dissection after thoracic endovascular aortic repair in patients with type B aortic dissection
Source: PubMed Central journal article supplement — Medicine (Baltimore). 2023 Apr 14;102(15):e32944. doi: 10.1097/MD.0000000000032944 (PMC10101253; doi:10.1097/md.0000000000032944), 2023-04-14
Supplement: medi-102-e32944-s005.pdf [file medi-102-e32944-s005.pdf]

**S5 Table.** Stent-graft oversizing

| <b>Author</b> | <b>Year</b> | <b>Stent-graft oversizing</b>                                                                                                                                       |
|---------------|-------------|---------------------------------------------------------------------------------------------------------------------------------------------------------------------|
| Czermak       | 2002        | Not reported                                                                                                                                                        |
| Kato          | 2002        | Stent diameters were oversized compared with the diameter of the aorta at the fixation sites in 10% to 20% of the estimated adjacent proximal aorta in dissections. |
| Palmer        | 2002        | Oversize stent-grafts at the aortic arch by 6 to 8 mm                                                                                                               |
| Fattori       | 2003        | Not reported                                                                                                                                                        |
| Grabenwoger   | 2004        | Not reported                                                                                                                                                        |
| Hansen        | 2004        | Stent diameters were oversized compared with the diameter of the aorta at the fixation sites in 10% to 20% of the estimated adjacent proximal aorta in dissections. |
| Lee           | 2004        | Stent diameters were oversized compared with the diameter of the aorta at the fixation sites in 10% to 15% of the estimated adjacent proximal aorta in dissections. |
| Dong Xu       | 2005        | A stent graft with a larger diameter (usually 10% to 20%) was chosen.                                                                                               |
| Fattori       | 2006        | Not reported                                                                                                                                                        |
| Duebener      | 2007        | Not reported                                                                                                                                                        |
| Zipfel        | 2007        | A stent graft with a larger diameter (usually 10% to 20%) was chosen.                                                                                               |
| Kpodonu       | 2008        | A stent graft with a larger diameter (usually 10% to 20%) was chosen.                                                                                               |
| Neuhauser     | 2008        | A stent graft with a larger diameter (10%) was chosen.                                                                                                              |
| Dong          | 2009        | A stent graft with a larger diameter (usually 10% to 15%) was chosen. (2 cases 15% and 9 cases 10%)                                                                 |
| Chiesa        | 2011        | Not reported                                                                                                                                                        |
| Kim           | 2011        | Not reported                                                                                                                                                        |
| Oberhuber     | 2011        | Not reported                                                                                                                                                        |
| Parsa         | 2011        | Not reported                                                                                                                                                        |
| Wiedemann     | 2013        | A stent graft with a larger diameter (10%) was chosen. (2 cases 15% and 9 cases 10%)                                                                                |

|                |      |                                                                       |
|----------------|------|-----------------------------------------------------------------------|
| Lotfi          | 2013 | Not reported                                                          |
| Wiedemann      | 2014 | A stent graft with a larger diameter (usually 10% to 20%) was chosen. |
| Faure          | 2014 | Greater than 20%                                                      |
| Idrees         | 2014 | Not reported                                                          |
| Zhang          | 2014 | A stent graft with a larger diameter (usually 10% to 20%) was chosen. |
| Gorlitzer      | 2012 | A stent graft with a larger diameter (usually 0% - 10%) was chosen.   |
| Huang          | 2013 | 16.5%                                                                 |
| Cochernec      | 2013 | A stent graft with a larger diameter (10%) was chosen.                |
| Shuyang Lu     | 2012 | Not reported                                                          |
| Yang           | 2012 | Not reported                                                          |
| Bunger         | 2013 | less than 10%                                                         |
| Canaud         | 2014 | 22%                                                                   |
| Lombardi       | 2012 | A stent graft with a larger diameter (usually 0% - 10%) was chosen.   |
| Jia            | 2013 | A stent graft with a larger diameter (usually 10% to 20%) was chosen. |
| Li             | 2014 | Not reported                                                          |
| Hanna          | 2014 | Not reported                                                          |
| De Rango       | 2014 | A stent graft with a larger diameter (usually 10% to 20%) was chosen. |
| Appoo          | 2015 | Not reported                                                          |
| Desai          | 2015 | 10%                                                                   |
| Kische         | 2015 | Less than 10%                                                         |
| Bockler        | 2016 | Not reported                                                          |
| Faure          | 2016 | 10%                                                                   |
| Wang           | 2016 | Not reported                                                          |
| Asaloumidis    | 2017 | 10%                                                                   |
| Zhao Liu       | 2017 | Not reported                                                          |
| Min-Hong Zhang | 2017 | A stent graft with a larger diameter (usually 10% to 20%) was chosen. |
| Tjaden         | 2018 | Not reported                                                          |
| Tao Ma         | 2018 | Less than 10%                                                         |
| Laquian        | 2018 | 2%-20%                                                                |

|                  |      |                                               |
|------------------|------|-----------------------------------------------|
| Chen             | 2018 | Not reported                                  |
| Piotr Buczkowski | 2019 | Not reported                                  |
| Eleshra          | 2020 | Not reported                                  |
| Fukushima        | 2019 | Less than 10%                                 |
| Wang             | 2019 | Not reported                                  |
| Yamine           | 2019 | Less than 10%                                 |
| Miura            | 2019 | Less than 10%                                 |
| Chassin-Trubert  | 2020 | Less than 10%                                 |
| Pellenc          | 2019 | Not reported                                  |
| Jiechang Zhu     | 2018 | 10% - 15%                                     |
| Riesterer        | 2018 | 13% (first quartile: 9%; third quartile: 14%) |
| Giles            | 2019 | 1%-10%                                        |
| Kuo              | 2019 | For RTAD patients: 11% and 14%                |
| Joo              | 2019 | 10%                                           |
| Cao              | 2020 | less than 5%                                  |
| El-Beyrouti      | 2020 | Not reported                                  |
| Charltonouw      | 2018 | Not reported                                  |
| Lou              | 2020 | 5%-10%                                        |
| Lee              | 2020 | Not reported                                  |
| Oshi             | 2020 | Less than 10%                                 |
| Puech-Leao       | 2020 | Not reported                                  |
| Sobocinski       | 2020 | Not reported                                  |
| Shuo Zhao        | 2020 | 10%-15%                                       |
| Bavaria          | 2015 | 12 ± 10%                                      |
| Peidro           | 2018 | 10 ± 7                                        |
| Ding             | 2018 | 10%-15%                                       |
| Nozdrzykowskia   | 2015 | Not reported                                  |
| Lei Liu          | 2016 | 10%                                           |
| Hu               | 2019 | 19.7%                                         |

|     |      |       |
|-----|------|-------|
| Gao | 2019 | 5-10% |
|-----|------|-------|
