# Supplementary material for: A systematic review and meta-analysis of retrograde type A aortic dissection after thoracic endovascular aortic repair in patients with type B aortic dissection
Source: PubMed Central journal article supplement — Medicine (Baltimore). 2023 Apr 14;102(15):e32944. doi: 10.1097/MD.0000000000032944 (PMC10101253; doi:10.1097/md.0000000000032944), 2023-04-14
Supplement: medi-102-e32944-s006.pdf [file medi-102-e32944-s006.pdf]

**S6 Table.** Clinical manifestation of retrograde type A dissection

| <b>Author</b> | <b>Year</b> | <b>RTAD (n)</b> | <b>Clinical Manifestations RTAD</b>                                                                                                                                                        |
|---------------|-------------|-----------------|--------------------------------------------------------------------------------------------------------------------------------------------------------------------------------------------|
| Czermak       | 2002        | 1               | Chest and backpain                                                                                                                                                                         |
| Palmer        | 2002        | 2               | No symptoms (one cases) and chest pain (one case)                                                                                                                                          |
| Dong Xu       | 2005        | 3               | No symptoms                                                                                                                                                                                |
| Neuhauser     | 2008        | 5               | New-onset chest pain                                                                                                                                                                       |
| Dong          | 2009        | 11              | Syncope, hypotension, dyspnea, hypoxemia, chest pain, and sudden death                                                                                                                     |
| Parsa         | 2011        | 2               | Chest pain (one case of 2 cases)                                                                                                                                                           |
| Idrees        | 2014        | 15              | Chest and/or back pain                                                                                                                                                                     |
| Gorlitzer     | 2012        | 4               | No symptoms (in one patient)                                                                                                                                                               |
| Cochernec     | 2013        | 4               | Asymptomatic                                                                                                                                                                               |
| Li            | 2014        | 6               | Chest pain in 16 cases and uncontrolled hypertension after TEVAR in 14 cases. Asymptomatic in 8 cases                                                                                      |
| Wang          | 2016        | 5               | Case 1: disturbance of consciousness and blood pressure decrease suddenly; Case 2: severe chest and back pain; Case 3: Chest discomfort; Case 4: Chest pain; Case 5: none (during surgery) |
| Zhao Liu      | 2017        | 6               | Serious chest pain (1 case), other cases (unknown)                                                                                                                                         |
| Chen          | 2018        | 1               | Persistent chest and back pain                                                                                                                                                             |
| Yamine        | 2019        | 15              | 9 cases Chest pain and five cases on routine CTA and one cases intra-OP                                                                                                                    |

|         |      |    |                                                                                            |
|---------|------|----|--------------------------------------------------------------------------------------------|
| Lei Liu | 2016 | 11 | 9 cases with RTAD (chest pain), 1 case (refractory HTN) and 1 case (Aneurysmal dilatation) |
| Hu      | 2019 | 12 | Chest pain and backpain (the most) and others (headache or syncope)                        |
