# Supplementary material for: A systematic review and meta-analysis of retrograde type A aortic dissection after thoracic endovascular aortic repair in patients with type B aortic dissection
Source: PubMed Central journal article supplement — Medicine (Baltimore). 2023 Apr 14;102(15):e32944. doi: 10.1097/MD.0000000000032944 (PMC10101253; doi:10.1097/md.0000000000032944), 2023-04-14
Supplement: medi-102-e32944-s007.pdf [file medi-102-e32944-s007.pdf]

**S7 Table.** Imaging follow-up

| <b>Author</b> | <b>Year</b> | <b>Diagnostic Modality RTAD</b>                                                                                                             |
|---------------|-------------|---------------------------------------------------------------------------------------------------------------------------------------------|
| Czermak       | 2002        | CT before discharge and at 3, 6, 12, and 24 months after intervention and yearly thereafter                                                 |
| Kato          | 2002        | CT                                                                                                                                          |
| Palmer        | 2002        | CT at 1 week, 3, 6 months after intervention                                                                                                |
| Fattori       | 2003        | CT and MRI 1, 3, 6, and 12 months after the procedure and yearly thereafter                                                                 |
| Grabenwoger   | 2004        | CT at 3, 6, and 12 months and then annually                                                                                                 |
| Hansen        | 2004        | CT at 1 and 6 months then annually                                                                                                          |
| Lee           | 2004        | CT at 1 month after the procedure, at 3 to 6-month intervals for 2 years, and annually thereafter                                           |
| Dong Xu       | 2005        | CT before discharge and at least once a year after operation.                                                                               |
| Fattori       | 2006        | 30 days to 6 months and yearly CT or MRI: CT was performed in 85% and MRI in 21% of cases                                                   |
| Duebener      | 2007        | CT                                                                                                                                          |
| Zipfel        | 2007        | MRI or high quality spiral CT and coronarography combined with aortography                                                                  |
| Kpodonu       | 2008        | CT of the chest abdomen and pelvis were obtained prior to discharge and at 1 and 6 months postoperatively and on an annual basis thereafter |
| Neuhauser     | 2008        | Contrast-enhanced spiral CT Scan at 3, 6, and 12 months and then annually                                                                   |
| Dong          | 2009        | CT at 1 and 6 months, then annually                                                                                                         |
| Chiesa        | 2011        | CT                                                                                                                                          |
| Kim           | 2011        | CT at 1, 3, 6, and 12 months and then annually                                                                                              |

|            |      |                                                                                                          |
|------------|------|----------------------------------------------------------------------------------------------------------|
| Oberhuber  | 2011 | CT at 3 and 6 months then annually                                                                       |
| Parsa      | 2011 | 4-view chest x-ray, and CT angiography at 1, 6, and 12 months postoperatively and annually               |
| Wiedemann  | 2013 | CT within 3 days of the procedure, at 3, 6, and 12 months, and yearly thereafter                         |
| Lotfi      | 2013 | CT scan at 3 months and annually thereafter                                                              |
| Wiedemann  | 2014 | CT                                                                                                       |
| Faure      | 2014 | Contrast-enhanced spiral CT Scan at 1, 3, , 6, and 12 months and then annually                           |
| Idrees     | 2014 | Contrast-enhanced spiral CT Scan at discharge, 3, and 12 months and then annually                        |
| Zhang      | 2014 | Outpatient or telephone at 1-, 3-, 6-, 12-month in the first postoperative year (without CT)             |
| Gorlitzer  | 2012 | CT                                                                                                       |
| Huang      | 2013 | CT or Angiography                                                                                        |
| Cochernec  | 2013 | Contrast-enhanced spiral CT at discharge, 3, and 6 months and then annually                              |
| Shuyang Lu | 2012 | CT angiography and echocardiography                                                                      |
| Yang       | 2012 | Contrast-enhanced spiral CT at 3, and 6 months, 12 months and then annually                              |
| Bunger     | 2013 | CT angiography at discharge, 3 and then annually                                                         |
| Canaud     | 2014 | CT                                                                                                       |
| Lombardi   | 2012 | CT before hospital discharge, at 1, 6 and 12 months after hospital discharge, and yearly (up to 5 years) |
| Jia        | 2013 | CT or MRI before hospital discharge, 6 and 12 months after hospital discharge, and yearly                |
| Li         | 2014 | CT at 1, 6, and 12 postoperative months and annually                                                     |
| Hanna      | 2014 | CT Angiography at 1, 6, and 12 months postoperatively and annually                                       |

|                  |      |                                                                                                                                                                     |
|------------------|------|---------------------------------------------------------------------------------------------------------------------------------------------------------------------|
| De Rango         | 2014 | CT Angiography at 1, 6, and 12 months postoperatively and annually                                                                                                  |
| Appoo            | 2015 | CT post operatively, at 6 and 12 months and then yearly                                                                                                             |
| Desai            | 2015 | CT                                                                                                                                                                  |
| Kische           | 2015 | CT Angiography                                                                                                                                                      |
| Bockler          | 2016 | CT Angiography before discharge, at 1 and 2 years thereafter                                                                                                        |
| Faure            | 2016 | CT Angiography was performed at 1, 6, and annually                                                                                                                  |
| Wang             | 2016 | CT Angiography was performed at 1 week, 3 months, 6 months, and 1 year after discharge and then annually and at any time if the patients were with special symptoms |
| Asaloumidis      | 2017 | CT post operatively, before discharge and at 6 and 12 months and then yearly                                                                                        |
| Zhao Liu         | 2017 | CT Angiography post operatively, before discharge and at 6 and 12 months and then yearly                                                                            |
| Min-Hong Zhang   | 2017 | CT Angiography at 3, 6, and 12 months postoperatively and annually                                                                                                  |
| Tjaden           | 2018 | CT scan                                                                                                                                                             |
| Tao Ma           | 2018 | CT at 1 month, 3 months, 6 months, and 12 months and yearly                                                                                                         |
| Laquian          | 2018 | CT at 1 month, 3 months, 6 months, and 12 months, 18 months, 24 months and yearly                                                                                   |
| Chen             | 2018 | CT                                                                                                                                                                  |
| Piotr Buczkowski | 2019 | CT at 1 month, 3 months, 6 months, and 12 months and yearly                                                                                                         |
| Eleshra          | 2020 | CT Angiography imaging within 30 days, at 12 months, and annually thereafter                                                                                        |
| Fukushima        | 2019 | enhanced CT scans during the postoperative period and 1 month, 6 months, and every 12 months after the procedure                                                    |
| Wang             | 2019 | CT                                                                                                                                                                  |

|                 |      |                                                                                                                            |
|-----------------|------|----------------------------------------------------------------------------------------------------------------------------|
| Yammine         | 2019 | CT Angiography at 30, 46, 123, 664, and 714 days postoperatively                                                           |
| Miura           | 2019 | CT Scan at 1 week, 6 months, and 12 months after TEVAR.                                                                    |
| Chassin-Trubert | 2020 | CT Angiography at 1 week, 3 and 6 months, and annually thereafter                                                          |
| Pellenc         | 2019 | CT Angiography at 1, 3, 6, and 12 months and once every year thereafter                                                    |
| Jiechang Zhu    | 2018 | CT Angiography prior to discharge and at 1, 3, 6, and 12 months after TEVAR                                                |
| Riesterer       | 2018 | CT Angiography were prformed before discharge and at during follow-up (median 16 months)                                   |
| Giles           | 2019 | CT Angiography at 1-month, 3-months, 6-months, 12-months, 18-months, 24-months and annually, thereafter                    |
| Kuo             | 2019 | CT                                                                                                                         |
| Joo             | 2019 | CT                                                                                                                         |
| Cao             | 2020 | CT angiography                                                                                                             |
| El-Beyrouti     | 2020 | CT Angiography post operatively, before discharge and at 3, 6 and then yearly                                              |
| Charltonouw     | 2018 | CT                                                                                                                         |
| Lou             | 2020 | Contrast-enhanced computed tomographic or magnetic resonance angiograms at the time of clinical intervention and follow-up |
| Lee             | 2020 | CT Angiography were obtained at 3 to 14 days, 3 to 6 months, and 12 months after the procedure and yearly thereafter       |
| Oshi            | 2020 | CT Scan                                                                                                                    |
| Puech-Leao      | 2020 | CT at 6 and 12, then yearly                                                                                                |
| Sobocinski      | 2020 | CT                                                                                                                         |
| Shuo Zhao       | 2020 | CT Angiography at 3, 6, and 12 months after TEVAR and annually thereafter                                                  |
| Bavaria         | 2015 | CT at 1, 6, and 12 months, and annually through 5 years                                                                    |

|                |      |                                                                            |
|----------------|------|----------------------------------------------------------------------------|
| Peidro         | 2018 | CT before discharge, at one month, six months, and 12 months then annually |
| Ding           | 2018 | CT Angiography at 3, 6, and 12 months after TEVAR and annually thereafter  |
| Nozdrzykowskia | 2015 | CT at 3, 6 and 12 months (and annually thereafter)                         |
| Lei Liu        | 2016 | CT was performed at 1, 6, and 12 months and then annually                  |
| Hu             | 2019 | CT Angiography                                                             |
| Gao            | 2019 | CT Angiography                                                             |

CT, computed tomography
