# Supplementary material for: A systematic review and meta-analysis of retrograde type A aortic dissection after thoracic endovascular aortic repair in patients with type B aortic dissection
Source: PubMed Central journal article supplement — Medicine (Baltimore). 2023 Apr 14;102(15):e32944. doi: 10.1097/MD.0000000000032944 (PMC10101253; doi:10.1097/md.0000000000032944), 2023-04-14
Supplement: medi-102-e32944-s008.pdf [file medi-102-e32944-s008.pdf]

**S8 Table.** Details of reported treatments of RTAD of enrolled studies

| First Author | Year | Nr. Patients TEVAR | RTAD | Medical Treatment of RTAD | Which Medical Treatments?          | Surgical Treatment of RTAD | Intervention 1 | Intervention 2 | Intervention 3 | Intervention 4 | Intervention 5 |
|--------------|------|--------------------|------|---------------------------|------------------------------------|----------------------------|----------------|----------------|----------------|----------------|----------------|
| Czermak      | 2002 | 5                  | 1    | NR                        | NR                                 | 1                          | 0              | 0              | 1              | 0              | 0              |
| Kato         | 2002 | 28                 | 1    | NR                        | NR                                 | NR                         | NR             | NR             | NR             | NR             | NR             |
| Palmer       | 2002 | 14                 | 2    | NR                        | NR                                 | 2                          | 0              | 0              | 2              | 0              | 0              |
| Fattori      | 2003 | 22                 | 2    | NR                        | NR                                 | 1                          | 0              | 1              | 0              | 0              | 0              |
| Grabenwoger  | 2004 | 20                 | 1    | NR                        | NR                                 | 1                          | 0              | 1              | 0              | 0              | 0              |
| Hansen       | 2004 | 24                 | 1    | NR                        | NR                                 | 1                          | 0              | 0              | 1              | 0              | 0              |
| Lee          | 2004 | 37                 | 1    | NR                        | NR                                 | 1                          | 0              | 1              | 0              | 0              | 0              |
| Dong Xu      | 2005 | 24                 | 3    | 1                         | conservative and medical treatment | 2                          | 0              | 1              | 1              | 0              | 0              |
| Fattori      | 2006 | 180                | 2    | NR                        | NR                                 | NR                         | NR             | NR             | NR             | NR             | NR             |
| Duebener     | 2007 | 13                 | 1    | NR                        | NR                                 | 1                          | 1              | NR             | NR             | NR             | NR             |

|           |      |     |    |    |                                                                                                                                                          |    |    |    |    |    |    |
|-----------|------|-----|----|----|----------------------------------------------------------------------------------------------------------------------------------------------------------|----|----|----|----|----|----|
| Zipfel    | 2007 | 57  | 1  | NR | NR                                                                                                                                                       | 1  | 0  | 0  | 1  | 0  | 0  |
| Kpodonu   | 2008 | 91  | 6  | NR | NR                                                                                                                                                       | 2  | 0  | 0  | 2  | 0  | 0  |
| Neuhauser | 2008 | 28  | 5  | NR | NR                                                                                                                                                       | 2  | 0  | 1  | 1  | 0  | 0  |
| Dong      | 2009 | 443 | 11 | 2  | Medical management with<br>Beta-blockers,<br>angiotensin-converting<br>enzyme inhibitors,<br>angiotensin receptor<br>blockers, or calcium<br>antagonists | 8  | 0  | 8  |    | 0  | 0  |
| Chiesa    | 2011 | 188 | 3  | NR | NR                                                                                                                                                       | 3  | 0  | 3  | 0  | 0  | 0  |
| Kim       | 2011 | 41  | 3  | NR | NR                                                                                                                                                       | 2  | 1  | 0  | 1  | 0  | 0  |
| Oberhuber | 2011 | 19  | 1  | NR | NR                                                                                                                                                       | 1  | 1  | 0  | 0  | 0  | 0  |
| Parsa     | 2011 | 51  | 2  | NR | NR                                                                                                                                                       | 2  | 0  | 0  | 2  | 0  | 0  |
| Wiedemann | 2013 | 80  | 3  | NR | NR                                                                                                                                                       | NR | NR | NR | NR | NR | NR |
| Lotfi     | 2013 | 11  | 3  | NR | NR                                                                                                                                                       | 3  | 2  | 0  | 0  | 1  | 0  |
| Wiedemann | 2014 | 110 | 6  | NR | NR                                                                                                                                                       | 6  | 6  | 0  | 0  | 0  | 0  |
| Faure     | 2014 | 41  | 1  | NR | NR                                                                                                                                                       | 1  | 0  | 0  | 1  | 0  | 0  |





|              |      |     |    |    |    |    |    |    |    |    |    |
|--------------|------|-----|----|----|----|----|----|----|----|----|----|
| Pellenc      | 2019 | 20  | 0  | NR |
| Jiechang Zhu | 2018 | 20  | 0  | NR |
| Riesterer    | 2018 | 34  | 1  | NR | NR | 1  | 0  | 0  | 1  | 0  | 0  |
| Giles        | 2019 | 258 | 12 | NR | NR | 12 | 12 | NR | NR | NR | NR |
| Kuo          | 2019 | 71  | 2  | NR | NR | 2  | 1  | 0  | 1  | 0  | 0  |
| Joo          | 2019 | 17  | 2  | NR | NR | 2  | 0  | 0  | 2  | 0  | 0  |
| Cao          | 2020 | 76  | 4  | NR | NR | 3  | 0  | 3  | 0  | 0  | 0  |
| El-Beyrouti  | 2020 | 5   | 0  | NR |
| Charltonouw  | 2018 | 43  | 3  | NR |
| Lou          | 2020 | 91  | 3  | NR | NR | 2  | 2  | 0  | 0  | 0  | 0  |
| Lee          | 2020 | 87  | 2  | NR |
| Oshi         | 2020 | 40  | 1  | NR | NR | 1  | 0  | 1  | 0  | 0  | 0  |
| Puech-Leao   | 2020 | 42  | 4  | NR |
| Sobocinski   | 2020 | 41  | 2  | NR | NR | 1  | 1  | 0  | 0  | 0  | 0  |
| Shuo Zhao    | 2020 | 79  | 1  | NR | NR | 1  | 1  | 0  | 0  | 0  | 0  |
| Bavaria      | 2015 | 50  | 2  | NR | NR | 2  | 2  | 0  | 0  | 0  | 0  |
| Peidro       | 2018 | 26  | 2  | NR | NR | 1  | 1  | 0  | 0  | 0  | 0  |

|                                                                                                                                                                                                                                                                                                                                                                                                                               |      |     |    |    |                                                                                                                                            |    |    |    |    |    |    |
|-------------------------------------------------------------------------------------------------------------------------------------------------------------------------------------------------------------------------------------------------------------------------------------------------------------------------------------------------------------------------------------------------------------------------------|------|-----|----|----|--------------------------------------------------------------------------------------------------------------------------------------------|----|----|----|----|----|----|
| Ding                                                                                                                                                                                                                                                                                                                                                                                                                          | 2018 | 16  | 1  | 1  | 1 case with RTAD (close Monitoring): The patient refused to undergo ascending aorta and total aortic arch replacement for economic reasons | 0  | 0  | 0  | 0  | 0  | 0  |
| Nozdrzykowska                                                                                                                                                                                                                                                                                                                                                                                                                 | 2015 | 129 | 1  | NR | NR                                                                                                                                         | 1  | 1  | 0  | 0  | 0  | 0  |
| Lei Liu                                                                                                                                                                                                                                                                                                                                                                                                                       | 2016 | 203 | 11 | NR | NR                                                                                                                                         | 7  | 7  | 0  | 0  | 0  | 0  |
| Hu                                                                                                                                                                                                                                                                                                                                                                                                                            | 2019 | 571 | 12 | NR | NR                                                                                                                                         | NR | NR | NR | NR | NR | NR |
| Gao                                                                                                                                                                                                                                                                                                                                                                                                                           | 2019 | 751 | 4  | NR | NR                                                                                                                                         | 4  | 4  | NR | NR | NR | NR |
| <ul style="list-style-type: none"> <li>- Intervention 1: No Exact Data about open repair</li> <li>- Intervention 2: Total arch repair (Ascending Aorta and Aortic arch replacement)</li> <li>- Intervention 3: Ascending repair or hemiarch repair or Bentall procedure or aortic root</li> <li>- Intervention 4: Ascending TEVAR or Re-Stent or Stent-Dilatation</li> <li>- Intervention 5: Frozen Elephant Trunk</li> </ul> |      |     |    |    |                                                                                                                                            |    |    |    |    |    |    |
