# Supplementary material for: A systematic review and meta-analysis of retrograde type A aortic dissection after thoracic endovascular aortic repair in patients with type B aortic dissection
Source: PubMed Central journal article supplement — Medicine (Baltimore). 2023 Apr 14;102(15):e32944. doi: 10.1097/MD.0000000000032944 (PMC10101253; doi:10.1097/md.0000000000032944), 2023-04-14
Supplement: medi-102-e32944-s009.pdf [file medi-102-e32944-s009.pdf]

**S9 Table.** Details (time and reasons) of mortality of RTAD

| <b>First Author</b> | <b>RTAD</b> | <b>mortality</b> | <b>0-14 days</b> | <b>Early 30 days</b> | <b>1-12 months</b> | <b>after one year</b> | <b>Early RTAD</b> | <b>Late RTAD</b> | <b>Information about cases and time of mortality (Reason of death)</b>              |
|---------------------|-------------|------------------|------------------|----------------------|--------------------|-----------------------|-------------------|------------------|-------------------------------------------------------------------------------------|
| Czermak             | 1           | NR               | NR               | NR                   | NR                 | NR                    | NR                | NR               | NR                                                                                  |
| Kato                | 1           | NR               | NR               | NR                   | NR                 | NR                    | NR                | NR               | NR                                                                                  |
| Palmer              | 2           | 0                | o                | o                    | o                  | o                     | o                 | o                | NR                                                                                  |
| Fattori             | 2           | 1                | 0                | 1                    | 0                  | 0                     | 1                 | 0                | One case with RTAD died POD 20                                                      |
| Grabenwoger         | 1           | 0                | o                | o                    | o                  | o                     | o                 | o                | NR                                                                                  |
| Hansen              | 1           | 0                | o                | o                    | o                  | o                     | o                 | o                | NR                                                                                  |
| Lee                 | 1           | 0                | o                | o                    | o                  | o                     | o                 | o                | NR                                                                                  |
| Dong Xu             | 3           | 2                | 2                | 2                    | 0                  | 0                     | 2                 | 0                | Two cases with RTAD died POD1 and POD7                                              |
| Fattori             | 2           | 2                | 0                | 0                    | 0                  | 2                     | 0                 | 2                | Two cases with RTAD died until 5 year as late mortality                             |
| Duebener            | 1           | NR               | NR               | NR                   | NR                 | NR                    | NR                | NR               | NR                                                                                  |
| Zipfel              | 1           | 0                | o                | o                    | o                  | o                     | o                 | o                | NR                                                                                  |
| Kpodonu             | 6           | 4                | NR               | NR                   | NR                 | NR                    | NR                | NR               | Extension of dissection the primary cause of death in 3 patients, and complications |



|            |    |    |    |    |    |    |    |    |                                                                             |
|------------|----|----|----|----|----|----|----|----|-----------------------------------------------------------------------------|
| Faure      | 1  | NR                                                                          |
| Idrees     | 15 | 0  | 0  | 0  | 0  | 0  | 0  | 0  | NR                                                                          |
| Zhang      | 2  | NR                                                                          |
| Gorlitzer  | 4  | 1  | 1  | 1  | 0  | 0  | 1  | 0  | One case with RTAD died POD 7<br>(Cardiac Tamponade)                        |
| Huang      | 4  | 4  | 4  | 4  | 0  | 0  | 4  | 0  | Four cases with RTAD died POD2,<br>POD4, POD 9, POD 10 (Rupture of<br>RTAD) |
| Cochernec  | 4  | 2  | 2  | 2  | 0  | 0  | 2  | 0  | Two cases with RTAD died in-hospital                                        |
| Shuyang Lu | 9  | 0  | 0  | 0  | 0  | 0  | 0  | 0  | NR                                                                          |
| Yang       | 1  | 1  | 0  | 0  | 1  | 0  | 0  | 1  | One case with RTAD died 4 months after<br>TEVAR                             |
| Bunger     | 1  | 1  | 1  | 1  | 0  | 0  | 1  | 0  | One case with RTAD died POD14                                               |
| Canaud     | 11 | NR                                                                          |
| Lombardi   | 3  | 0  | 0  | 0  | 0  | 0  | 0  | 0  | NR                                                                          |
| Jia        | 3  | 1  | NR                                                                          |
| Li         | 6  | NR                                                                          |
| Hanna      | 1  | 0  | 0  | 0  | 0  | 0  | 0  | 0  | NR                                                                          |
| De Rango   | 4  | 2  | NR                                                                          |





|                |    |    |    |    |    |    |    |    |                                               |
|----------------|----|----|----|----|----|----|----|----|-----------------------------------------------|
| Lee            | 2  | NR                                            |
| Oshi           | 1  | 1  | 0  | 0  | 0  | 1  | 0  | 1  | One case with RTAD died 18 months after TEVAR |
| Puech-Leao     | 4  | 4  | 4  | 4  | 0  | 0  | 4  | 0  | Four cases with RTAD died intraoperatively    |
| Sobocinski     | 2  | 1  | NR | 1  | NR | NR | 1  | NR | One case with RTAD died during 30 days        |
| Shuo Zhao      | 1  | NR                                            |
| Bavaria        | 2  | NR                                            |
| Peidro         | 2  | 1  | NR | NR | NR | NR | NR | NR | One case with RTAD died after reintervention  |
| Ding           | 1  | 0  | 0  | 0  | 0  | 0  | 0  | 0  | NR                                            |
| Nozdrzykowskia | 1  | NR                                            |
| Lei Liu        | 11 | 4  | NR                                            |
| Hu             | 12 | NR                                            |
| Gao            | 4  | 4  | NR                                            |
